# Supplementary material
Source: PubMed Central journal article supplement (PMC10266990)
Supplement: 10067_2023_6584_MOESM3_ESM.pdf [file 10067_2023_6584_MOESM3_ESM.pdf]

## Online Resource Table S3

Article: The association between rheumatoid arthritis and reduced estimated cardiorespiratory fitness is mediated by physical symptoms and negative emotions: a cross-sectional study

Journal: Clinical Rheumatology.

Authors: Ingrid Sæther Houge, Mari Hoff, Vibeke Videm

Corresponding author: Professor Vibeke Videm MD PhD

Department of Clinical and Molecular Medicine, Lab Centre 3 East

St. Olavs hospital, NO-7006 Trondheim, Norway

Tel: +47 72 57 33 21, e-mail: [vibeke.videm@ntnu.no](mailto:vibeke.videm@ntnu.no)

**Online Resource Table S3: Detailed results from Structural Equation Model 2b <sup>a,b</sup>**

|                                  | Unstandardized coefficients (95% confidence interval) |                       |                       | Standardized coefficients |                 |              |
|----------------------------------|-------------------------------------------------------|-----------------------|-----------------------|---------------------------|-----------------|--------------|
|                                  | Direct effect                                         | Indirect effect       | Total effect          | Direct effect             | Indirect effect | Total effect |
| Effect on eCRF                   |                                                       |                       |                       |                           |                 |              |
| - Rheumatoid arthritis           | -0.78 (-1.99, 0.42)                                   | -0.93 (-1.50, -0.35)* | -1.71 (-2.81 -0.62)*  | -0.041                    | -0.048*         | -0.089*      |
| - Male sex                       | 9.50 (8.56, 10.44)*                                   | 0.25 (0.05, 0.46)†    | 9.75 (8.82, 10.69)*   | 0.490*                    | 0.013†          | 0.503*       |
| - Age                            | -0.39 (-0.43, -0.36)*                                 | -0.02 (-0.04, 0.00)   | -0.41 (-0.44, -0.38)* | -0.661*                   | -0.029          | -0.690*      |
| - Negative emotions              | 1 (constrained)                                       | -                     | 1 (constrained)       | 0.107*                    | -               | 0.107*       |
| Effect on rheumatoid arthritis   |                                                       |                       |                       |                           |                 |              |
| - Male sex                       | -0.15 (-0.22, -0.08)*                                 | -                     | -0.15 (-0.22, -0.08)* | -0.148*                   | -               | -0.148*      |
| - Age                            | 0.02 (0.01, 0.02)*                                    | -                     | 0.02 (0.01, 0.02)*    | 0.516*                    | -               | 0.516*       |
| Effect on negative emotions      |                                                       |                       |                       |                           |                 |              |
| - Rheumatoid arthritis           | -0.93 (-1.50, -0.35)*                                 | -                     | -0.93 (-1.50, -0.35)* | -0.453*                   | -               | -0.453*      |
| - Male sex                       | -                                                     | 0.14 (0.03, 0.25)†    | 0.14 (0.03, 0.25)†    | -                         | 0.067†          | 0.067†       |
| - Age                            | 0.01 (0.00, 0.02)†                                    | -0.02 (-0.02, -0.01)* | -0.01 (-0.01, 0.00)   | 0.157†                    | -0.234*         | -0.077       |
| Effect on HADS-D                 |                                                       |                       |                       |                           |                 |              |
| - Rheumatoid arthritis           | -                                                     | 2.35 (1.80, 2.89)*    | 2.35 (1.80, 2.89)*    | -                         | 0.406*          | 0.406*       |
| - Negative emotions              | -2.52 (-4.00, 1.05)*                                  | -                     | -2.52 (-4.00, -1.05)* | -0.897*                   | -               | -0.897*      |
| - Sex                            | 0.23 (-0.24, 0.71)                                    | -0.35 (-0.54, -0.16)* | -0.12 (-0.61, 0.38)   | 0.040                     | -0.060*         | -0.020       |
| - Age                            | -                                                     | 0.01 (0.00, 0.03)     | 0.01 (0.00, 0.03)     | -                         | 0.069           | 0.069        |
| Effect on perceived stress scale |                                                       |                       |                       |                           |                 |              |
| - Rheumatoid arthritis           | -                                                     | 4.18 (2.99, 5.37)*    | 4.18 (2.99, 5.37)*    | -                         | 0.334*          | 0.334*       |
| - Negative emotions              | -4.50 (-7.03, -1.96)*                                 | -                     | -4.50 (-7.03, -1.96)* | -0.737*                   | -               | -0.737*      |
| - Male sex                       | -1.30 (-2.34, -0.26)†                                 | -0.62 (-0.98, -0.27)* | -1.92 (2.99, -0.85)*  | -0.103†                   | -0.049*         | -0.152*      |
| - Age                            | -                                                     | 0.02 (0.00, 0.05)     | 0.02 (0.00, 0.05)     | -                         | 0.057           | 0.057        |

<sup>a</sup>Abbreviations: eCRF estimated cardiorespiratory fitness, HADS-D Hospital Anxiety and Depression Scale' Depression Score. †<0.05. \*<0.01.

<sup>b</sup>Model 2b: The effect of rheumatoid arthritis status on estimated cardiorespiratory fitness, directly and indirectly through negative emotions, in a model adjusted for age and sex.
