# Supplementary material
Source: PubMed Central journal article supplement (PMC10266990)
Supplement: 10067_2023_6584_MOESM4_ESM.pdf [file 10067_2023_6584_MOESM4_ESM.pdf]

## Online Resource Table S4

Article: The association between rheumatoid arthritis and reduced estimated cardiorespiratory fitness is mediated by physical symptoms and negative emotions: a cross-sectional study

Journal: Clinical Rheumatology.

Authors: Ingrid Sæther Houge, Mari Hoff, Vibeke Videm

Corresponding author: Professor Vibeke Videm MD PhD

Department of Clinical and Molecular Medicine, Lab Centre 3 East

St. Olavs hospital, NO-7006 Trondheim, Norway

Tel: +47 72 57 33 21, e-mail: [vibeke.videm@ntnu.no](mailto:vibeke.videm@ntnu.no)

**Online Resource Table S4: Detailed results from Structural Equation Model 3 <sup>a,b</sup>**

|                                      | Unstandardized coefficients (95% confidence interval) |                       |                       | Standardized coefficients |                 |              |
|--------------------------------------|-------------------------------------------------------|-----------------------|-----------------------|---------------------------|-----------------|--------------|
|                                      | Direct effect                                         | Indirect effect       | Total effect          | Direct effect             | Indirect effect | Total effect |
| Effect on eCRF                       |                                                       |                       |                       |                           |                 |              |
| - Rheumatoid arthritis               | -0.46 (-1.70, 0.77)                                   | -1.30 (-1.98, -0.62)* | -1.76 (-2.85, -0.68)* | -0.024                    | -0.068*         | -0.092*      |
| - Male sex                           | 9.30 (8.37, 10.22)*                                   | 0.26 (0.06, 0.47)†    | 9.56 (8.64, 10.48)*   | 0.480*                    | 0.014†          | 0.494*       |
| - Age                                | -0.39 (-0.42, -0.35)*                                 | -0.02 (-0.05, 0.00)†  | -0.41 (-0.44, -0.38)* | -0.652*                   | -0.043†         | 0.695*       |
| - Physical symptoms                  | 1 (constrained)                                       | -                     | 1 (constrained)       | 0.072†                    | -               | 0.072†       |
| - Negative emotions                  | -0.27 (-0.53, -0.02)†                                 | -                     | -0.27 (-0.53, -0.02)† | -0.074†                   | -               | -0.074†      |
| Effect on rheumatoid arthritis       |                                                       |                       |                       |                           |                 |              |
| - Male sex                           | -0.15 (-0.22, -0.08)*                                 | -                     | -0.15 (-0.22, -0.08)* | -0.148*                   | -               | -0.148*      |
| - Age                                | 0.02 (0.01, 0.02)*                                    | -                     | 0.02 (0.01, 0.02)*    | 0.516*                    | -               | 0.516*       |
| Effect on physical symptoms          |                                                       |                       |                       |                           |                 |              |
| - Rheumatoid arthritis               | -0.65 (-1.31, 0.00)                                   | -                     | -0.65 (-1.31, 0.00)   | -0.471                    | -               | -0.471       |
| - Male sex                           | -                                                     | 0.10 (-0.01, 0.21)    | 0.10 (-0.01, 0.21)    | -                         | 0.070           | 0.070        |
| - Age                                | -0.01 (-0.01, 0.00)                                   | -0.01 (-0.02, 0.00)   | -0.02 (-0.03, 0.00)   | -0.101                    | -0.243          | -0.344       |
| Effect on joint pain past six months |                                                       |                       |                       |                           |                 |              |
| - Rheumatoid arthritis               | -                                                     | 2.38 (1.90, 2.86)*    | 2.38 (1.90, 2.86)*    | -                         | 0.416*          | 0.416*       |
| - Physical symptoms                  | -3.65 (-7.28, -0.03)†                                 | -                     | -3.65 (-7.28, -0.03)† | -0.882†                   | -               | -0.882†      |
| - Sex                                | -                                                     | -0.36 (-0.54, -0.17)* | -0.36 (-0.54, -0.17)* | -                         | -0.061*         | -0.061*      |
| - Age                                | -                                                     | 0.05 (0.04, 0.07)*    | 0.05 (0.04, 0.07)*    | -                         | 0.304*          | 0.304*       |
| Effect on morning stiffness          |                                                       |                       |                       |                           |                 |              |
| - Rheumatoid arthritis               | -                                                     | 2.25 (1.80, 2.71)*    | 2.25 (1.80, 2.71)*    | -                         | 0.398*          | 0.398*       |
| - Physical symptoms                  | -3.46 (-6.89, -0.03)†                                 | -                     | -3.46 (-6.89, -0.03)† | -0.845†                   | -               | -0.845†      |
| - Sex                                | -                                                     | -0.34 (-0.51, -0.16)* | -0.34 (-0.51, -0.16)* | -                         | -0.059*         | -0.059*      |
| - Age                                | -                                                     | 0.05 (0.04, 0.06)*    | 0.05 (0.04, 0.06)*    | -                         | 0.291*          | 0.291*       |
| Effect on pain in neck/back/hips     |                                                       |                       |                       |                           |                 |              |
| - Rheumatoid arthritis               | -                                                     | 1.94 (1.49, 2.40)*    | 1.94 (1.49, 2.40)*    | -                         | 0.327*          | 0.327*       |
| - Physical symptoms                  | -2.98 (-5.90, -0.07)†                                 | -                     | -2.98 (-5.90, -0.07)† | -0.694†                   | -               | -0.694†      |
| - Sex                                | -                                                     | -0.29 (-0.45, -0.13)* | -0.29 (-0.45, -0.13)* | -                         | -0.048*         | -0.048*      |
| - Age                                | -                                                     | 0.04 (0.03, 0.06)*    | 0.04 (0.03, 0.06)*    | -                         | 0.239*          | 0.239*       |
| Effect on negative emotions          |                                                       |                       |                       |                           |                 |              |
| - Rheumatoid arthritis               | 2.36 (1.82, 2.91)*                                    | -                     | 2.36 (1.82, 2.91)*    | 0.456*                    | -               | 0.456*       |
| - Male sex                           | -                                                     | -0.35 (-0.54, -0.16)* | -0.35 (-0.54, -0.16)* | -                         | -0.067*         | -0.067*      |

|                                  |                       |                       |                       |         |         |         |
|----------------------------------|-----------------------|-----------------------|-----------------------|---------|---------|---------|
| - Age                            | -0.03 (-0.04, -0.01)* | 0.04 (0.03, 0.05)*    | 0.01 (0.00, 0.03)     | -0.159* | 0.236*  | 0.077   |
| Effect on HADS-D                 |                       |                       |                       |         |         |         |
| - Rheumatoid arthritis           | -                     | 2.36 (1.82, 2.91)*    | 2.36 (1.82, 2.91)*    | -       | 0.409*  | 0.409*  |
| - Negative emotions              | 1 (constrained)       | -                     | 1 (constrained)       | 0.897*  | -       | 0.897*  |
| - Sex                            | 0.34 (-0.11, 0.79)    | -0.35 (-0.54, -0.16)* | -0.01 (-0.48, 0.46)   | 0.058   | -0.060* | -0.002  |
| - Age                            | -                     | 0.01 (0.00, 0.03)     | 0.01 (0.00, 0.03)     | -       | 0.069   | 0.069   |
| Effect on perceived stress scale |                       |                       |                       |         |         |         |
| - Rheumatoid arthritis           | -                     | 4.23 (3.02, 5.43)*    | 4.23 (3.02, 5.43)*    | -       | 0.338*  | 0.338*  |
| - Negative emotions              | 1.79 (1.39, 2.18)*    | -                     | 1.79 (1.39, 2.18)*    | 0.740*  | -       | 0.740*  |
| - Male sex                       | -1.11 (-2.10, -0.11)† | -0.63 (-0.99, -0.27)* | -1.73 (-2.77, -0.70)* | -0.088† | -0.050* | -0.138* |
| - Age                            | -                     | 0.02 (0.0, 0.05)      | 0.02 (0.00, 0.05)     | -       | 0.057   | 0.057   |

<sup>a</sup>Abbreviations: eCRF estimated cardiorespiratory fitness, HADS-D Hospital Anxiety and Depression Scale' Depression Score. †<0.05. \*<0.01.

<sup>b</sup>Model 3: The effect of rheumatoid arthritis status on estimated cardiorespiratory fitness, directly and indirectly through physical symptoms and negative emotions, in a model adjusted for age and sex
